# Supplementary material
Source: publisher site journal article supplement (https://www.dovepress.com/article/440584)
Supplement: Supplementary file 1 [file get_supplementary_file.php]

Supplementary Material

# Supplementary Tables and Figures

# 1.1 Supplementary Tables

Table S1: Description of the distribution of lifestyle-related and health-related variables of the study population [*n (%)*].

| Group | Variables | Male(*n*=6988) | Female(*n*=13960) | All(*n*=20948) |
| --- | --- | --- | --- | --- |
| Smoke | Non-smoker | 2005(28.7) | 13917(99.7) | 15922(76.0) |
|  | Smoking | 4339(62.1) | 35(0.3) | 4374(20.9) |
|  | Quit smoking | 644(9.2) | 8(0.1) | 652(3.1) |
| METs-h/w | ≤21.4 | 2475(35.4) | 4499(32.2) | 6974(33.3) |
|  | 21.4-41.1 | 2184(31.3) | 4828(34.6) | 7012(33.5) |
|  | ≥41.1 | 2329(33.3) | 4633(33.2) | 6962(33.2) |
| Alcohol consumption | Hardly ever drink | 2912(41.7) | 12508(89.6) | 15420(73.6) |
|  | Occasionally | 2019(28.9) | 1217(8.7) | 3236(15.4) |
|  | 1-2 days/week | 227(3.2) | 55(0.4) | 282(1.3) |
|  | 3-5 days/week | 213(3.0) | 27(0.2) | 240(1.1) |
|  | Drink daily | 1617(23.1) | 153(1.1) | 1770(8.4) |
| Snoring conditions | often | 2209(31.6) | 1759(12.6) | 3968(18.9) |
|  | Occasional | 1674(24.0) | 2387(17.1) | 4061(19.4) |
|  | No | 3105(44.4) | 9814(70.3) | 12919(61.7) |
| Napping habits | Yes | 2262(32.4) | 2732(19.6) | 4994(23.8) |
|  | No | 4726(67.6) | 11228(80.4) | 15954(76.2) |
| Asthma | Yes | 61(0.9) | 111(0.8) | 172(0.8) |
|  | No | 6927(99.1) | 13849(99.2) | 20776(99.2) |
| Coronary heart disease | Yes | 113(1.6) | 155(1.1) | 268(1.3) |
|  | No | 6875(98.4) | 13805(98.9) | 20680(98.7) |
| Stroke | Yes | 46(0.7) | 45(0.3) | 91(0.4) |
|  | No | 6942(99.3) | 13915(99.7) | 20857(99.6) |
| Diabetes | Yes | 837(12.0) | 1060(7.6) | 1897(9.1) |
|  | No | 6151(88.0) | 12900(92.4) | 19051(90.9) |
| Hypertension | Yes | 2245(32.1) | 3905(28.0) | 6150(29.4) |
|  | No | 4743(67.9) | 10055(72.0) | 14798(70.6) |
| Sleep duration | ≤7h | 1693(24.2) | 3370(24.1) | 5063(24.2) |
|  | 7~9h | 3634(52.0) | 7022(50.3) | 10656(50.9) |
|  | ≥9 h | 1661(23.8) | 3568(25.6) | 5229(25.0) |
| The number of Insomnia types | 0 | 4894(70.0) | 8357(59.9) | 13251(63.3) |
|  | 1 | 847(12.1) | 1748(12.5) | 2595(12.4) |
|  | 2 | 827(11.8) | 2383(17.1) | 3210(15.3) |
|  | 3 | 420(6.0) | 1472(10.5) | 1892(9.0) |
| BMI | Thin | 469(6.7) | 988(7.1) | 1457(7.0) |
|  | Normal | 4079(58.4) | 8022(57.5) | 12101(57.8) |
|  | Overweight | 1932(27.6) | 3933(28.2) | 5865(28.0) |
|  | Obese | 508(7.3) | 1017(7.3) | 1525(7.3) |

Table S2: Results of a univariate logistic regression on the association between different factors with Comorbid depressive and anxiety symptoms

| Variables | | Groups | Comorbid depressive and anxiety symptoms | | *OR (95%CI)* | *p-*value |
| --- | --- | --- | --- | --- | --- | --- |
|  | |  | Yes | No |  |
| Smoke | | Non-smoker | 521(3.3) | 15401(96.7) | 1.00 (*ref*.) | <0.001 |
|  | | Smoking | 73(1.7) | 4301(98.3) | 0.642(0.486,0.848) |  |
|  | | Quit smoking | 7(1.1) | 645(98.9) | 0.314(0.146,0.673) |  |
| METs-h/w | ≤21.4 | | 233(3.3) | 6741(96.7) | 1.00 (*ref.*) | 0.006 |
|  | 21.4-41.1 | | 162(2.3) | 6850(97.7) | 0.714(0.580,0.880) |  |
|  | ≥41.1 | | 206(3.0) | 6756(97.0) | 0.893(0.732,1.090) |  |
| Alcohol consumption | | Hardly ever drink | 475(3.1) | 14945(96.9) | 1.00 (*ref.*) | 0.009 |
| Occasionally | 89(2.8) | 3147(97.2) | 1.173(0.919,1.498) |  |
| 1-2 days/week | 13(4.6) | 269(95.4) | 2.108(1.167,3.809) |  |
| 3-5 days/week | 3(1.3) | 237(98.8) | 0.592(0.185,1.892) |  |
| Drink daily | 21(1.2) | 1749(98.8) | 0.627(0.392,1.002) |  |
| Snoring conditions | | often | 109(2.7) | 3859(97.3) | 1.00 (*ref.*) | 0.602 |
|  | | Occasional | 102(2.5) | 3959(97.5) | 1.067(0.847,1.345) |  |
|  | | No | 390(3.0) | 12529(97.0) | 0.924(0.736,1.161) |  |
| Napping habits | | Yes | 121(2.4) | 4873(97.6) | 0.906(0.735,1.116) | 0.353 |
|  | | No | 480(3.0) | 15474(97.0) | 1.00 (*ref.*) |  |
| Asthma | | Yes | 14(8.1) | 158(91.9) | 1.805(0.999,3.259) | 0.048 |
| No | 587(2.8) | 20189(97.2) | 1.00 (*ref.*) |  |
| Coronary heart disease | | Yes | 24(9.0) | 244(91.0) | 2.653(1.680,4.188) | <0.001 |
| No | 577(2.8) | 20103(97.2) | 1.00 (*ref.*) |  |
| Stroke | | Yes | 8(8.8) | 83(91.2) | 2.256(1.023,4.975) | 0.044 |
| No | 593(2.8) | 20264(97.2) | 1.00 (*ref.*) |  |
| Diabetes | | Yes | 57(3.0) | 1840(97.0) | 0.981(0.732,1.315) | 0.899 |
| No | 544(2.9) | 18507(97.1) | 1.00 (*ref.*) |  |
| Hypertension | | Yes | 184(3.0) | 5966(97.0) | 0.885(0.734,1.067） | 0.201 |
|  | | No | 417(2.8) | 14381(97.2) | 1.00 (*ref.*) |  |
| Sleep duration | | ≤7h | 250(4.9) | 4813(95.1) | 1.00 (*ref.*) | <0.001 |
|  | | 7~9h | 213(2.0) | 10443(98.0) | 1.480(1.213,1.807) |  |
|  | | ≥9 h | 138(2.6) | 5091(97.4) | 1.295(1.039,1.614) |  |
| The number of Insomnia types | | 0 | 174(1.3) | 13077(98.7) | 1.00 (*ref.*) | <0.001 |
| 1 | 72(2.8) | 2523(97.2) | 1.958(1.476,2.598) |  |
| 2 | 171(5.3) | 3039(94.7) | 3.601(2.871,4.517) |  |
| 3 | 184(9.7) | 1708(90.3) | 6.698(5.342,8.399) |  |
| BMI | | Thin | 57(3.9) | 1400(96.1) | 1.00 (*ref.*) | 0.186 |
|  | | Normal | 333(2.8) | 11768(97.2) | 1.290(0.961,1.730) |  |
|  | | Overweight | 159(2.7) | 5706(97.3) | 1.017(0.834,1.239) |  |
|  | | Obese | 52(3.4) | 1473(96.6) | 1.271(0.928,1.740) |  |

Table S3: The association between sleep duration and CDAS in participants after those participants with a history of sleeping pills were excluded

| Sleep duration | Total | Case | Model 1a | Model 2b | | Model 3c |
| --- | --- | --- | --- | --- | --- | --- |
|  |  |  | *OR* *(95%CI)* | *OR (95%CI)* | | *OR (95%CI)* |
| <7h | 4780 | 218 | 2.448(2.014,2.976) | | 1.591(1.287,1.968) | 1.596(1.289,1.975) |
| 7~9h | 10447 | 200 | *ref* | *ref* | | *ref* |
| >9h | 5118 | 128 | 1.314(1.050,1.645) | | 1.171(0.929,1.475) | 1.171(0.929,1.476) |

a: No covariates adjustment was made.

b: Adjusted for ethnicity, age, gender, previous occupation, household income, marital status, education level, smoking status, alcohol consumption, metabolic equivalents, and the number of Insomnia types.

c: Adjusted for body mass index (BMI), asthma, coronary heart disease, and stroke on the basis of model 2.

Table S4: The association between Insomnia and CDAS in participants after those participants with a history of sleeping pills were excluded

| The number of Insomnia types | Total | Case | Model 1a | | | Model 2b | | | Model 3c | | |
| --- | --- | --- | --- | --- | --- | --- | --- | --- | --- | --- | --- |
| *OR (95%CI)* | *p* for trend | | *OR (95%CI)* | *p* for trend | | *OR (95%CI)* | *p* for trend | |
| 0 | 13191 | 171 | *ref* | | <0.001 | *ref* | | <0.001 | *ref* | | <0.001 |
| 1 | 2495 | 69 | 2.166(1.632,2.874) | | 1.867(1.399,2.493) | | 1.865(1.397,2.490) | |
| 2 | 3004 | 153 | 4.086(3.273,5.101) | | 2.967(2.342,3.759) | | 2.937(2.317,3.721) | |
| 3 | 1655 | 153 | 7.756(6.196,9.709) | | 4.972(3.899,6.339) | | 4.898(3.839,6.249) | |

a: No covariates adjustment was made.

b: Adjusted for ethnicity, age, gender, occupation, household income, marital status, education level, smoking status, alcohol consumption, Metabolic equivalents, and Sleep duration.

c: Adjusted for body mass index (BMI), asthma, coronary heart disease, and stroke on the basis of Model 2.

#
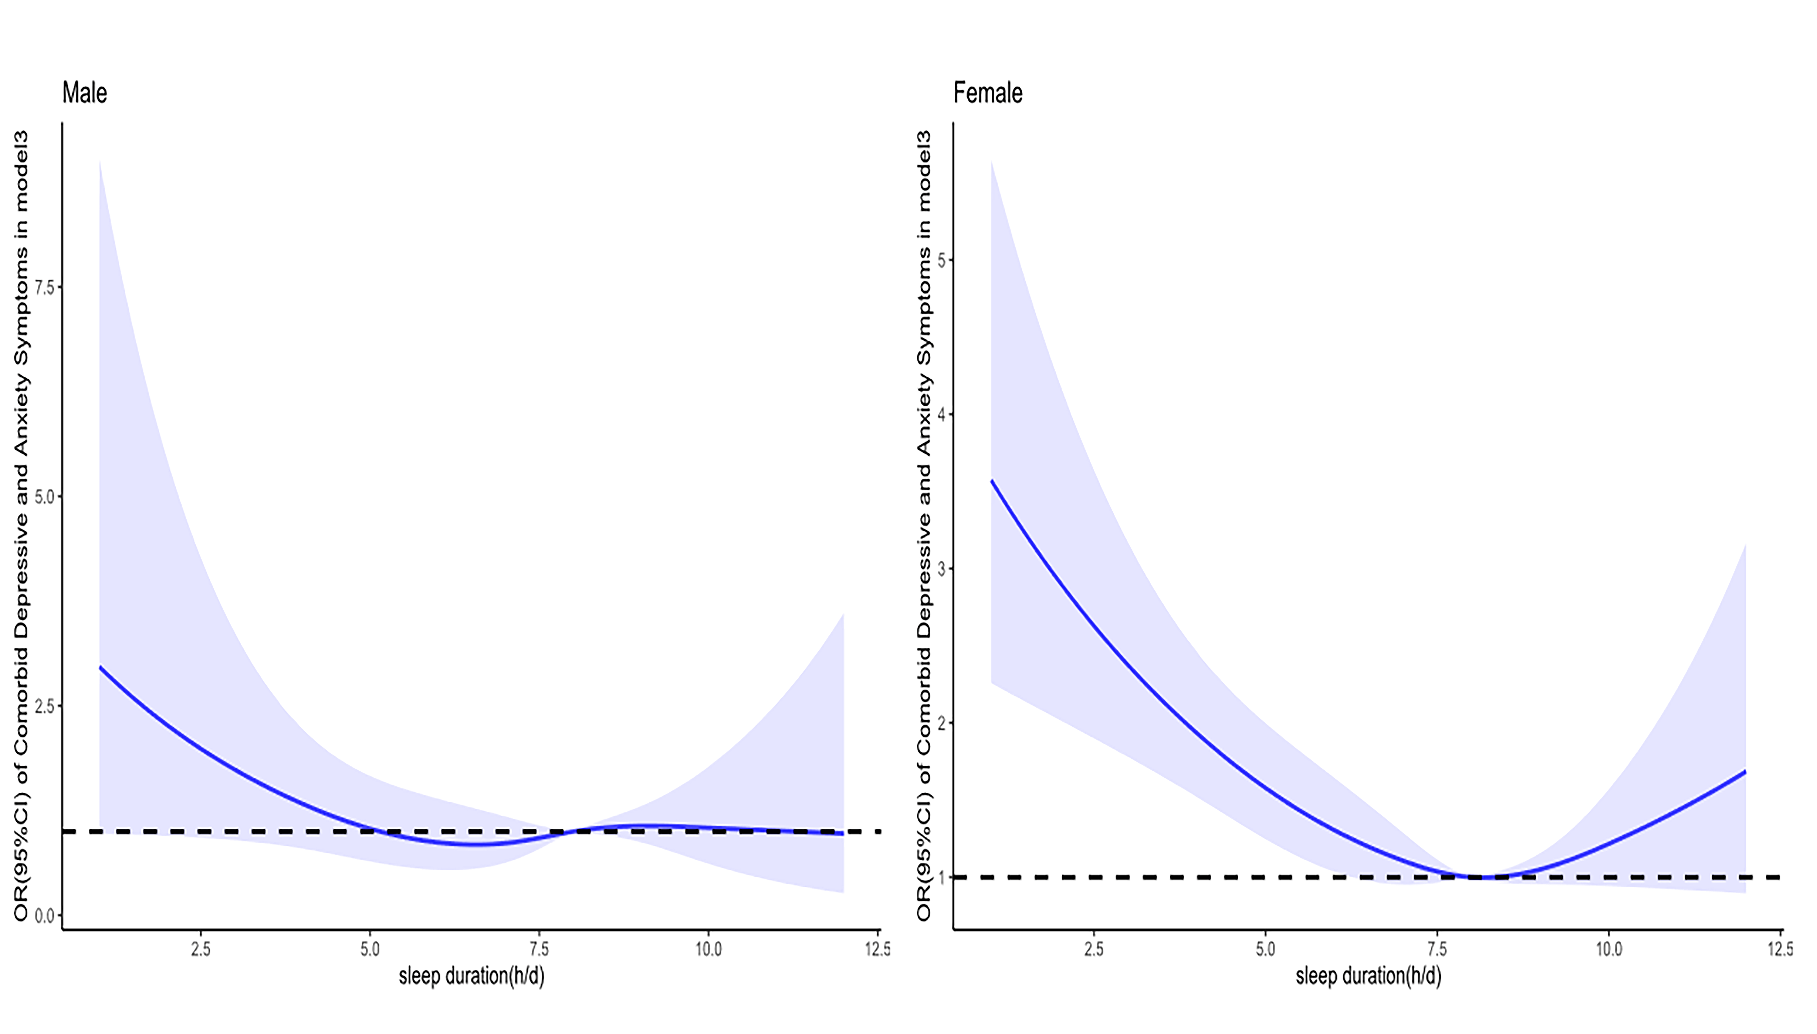
1.2 Supplementary Figures

**Figure S1 Multifactorial adjusted dose-response relationship between sleep duration and CDAS in participants with different sex.**

*Adjusted for ethnicity, age, body mass index (BMI), previous occupation, household income, marital status, education level, smoking status, alcohol consumption, metabolic equivalents, asthma, coronary heart disease, stroke and the number of Insomnia types.* *The OR is shown with the blue solid line, and 95% CIs are shown with the shaded area. The black horizontal short dashed line represents the reference line y=1*


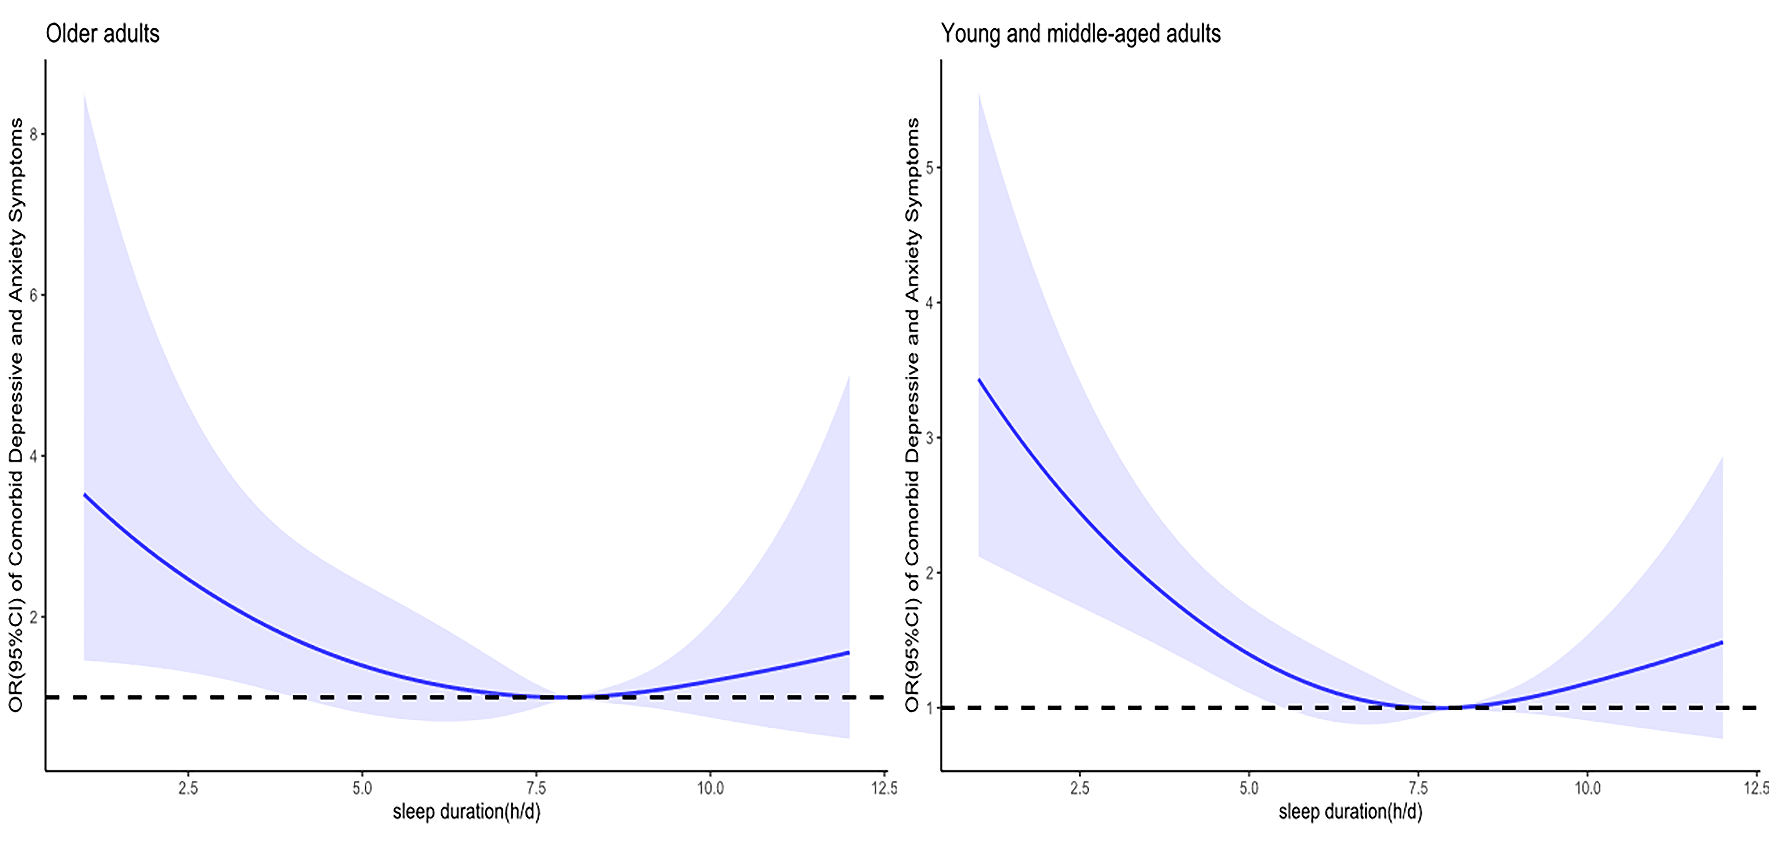
**Figure S2 Multifactorial adjusted dose-response relationship between sleep duration and CDAS in participants with different age group.**

*Adjusted for ethnicity, gender, body mass index (BMI), previous occupation, household income, marital status, education level, smoking status, alcohol consumption, metabolic equivalents, asthma, coronary heart disease, stroke and the number of Insomnia types.* *The OR is shown with the blue solid line, and 95% CIs are shown with the shaded area. The black horizontal short dashed line represents the reference line y=1*


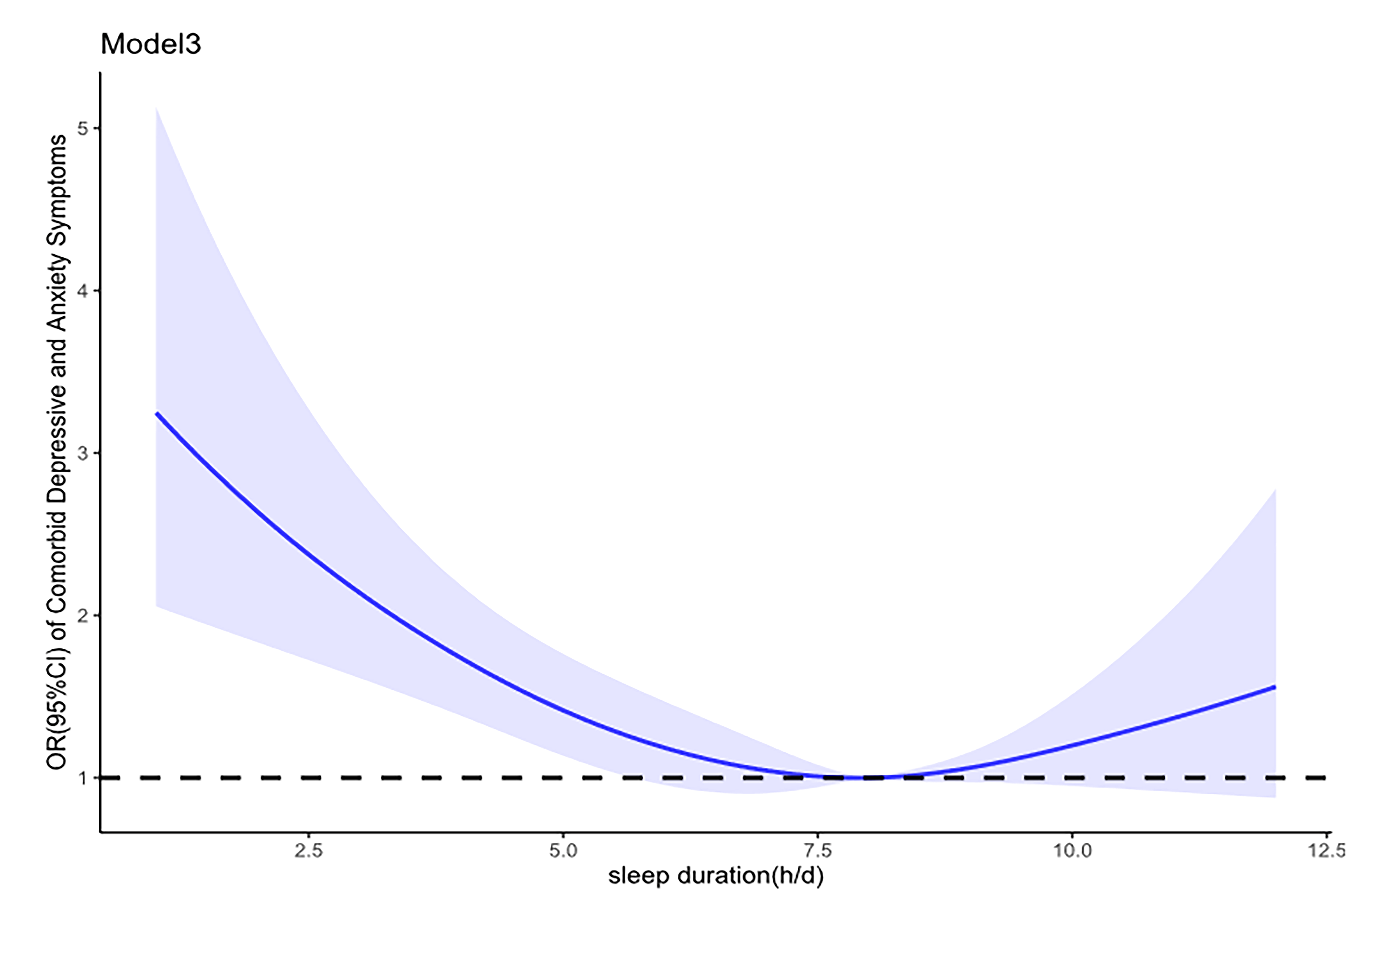
 **Figure S3 Multifactor-adjusted dose-response relationships between sleep duration and CDAS in participants with no history of sleeping pills**

*Adjusted for ethnicity, age, gender, body mass index (BMI), previous occupation, household income, marital status, education level, smoking status, alcohol consumption, metabolic equivalents, asthma, coronary heart disease, stroke and the number of Insomnia types.* *The OR is shown with the blue solid line, and 95% CIs are shown with the shaded area. The black horizontal short dashed line represents the reference line y=1*
